# Supplementary material for: Arthritis in adults, socioeconomic factors, and the moderating role of childhood maltreatment: cross-sectional data from the National Epidemiological Survey on Alcohol and Related Conditions
Source: Springer Nature journal article supplement (doi:10.1007/s00198-018-4671-x), 2018-08-21
Supplement: MOESM1 [file 16061482]

**Online Supplementary Table 1: Prevalence and odds (95%CI) of arthritis across parameters of socioeconomic status (SES) for the total population**

| SES | % (n) | OR (95% CI) |
| --- | --- | --- |
| **Total** | 25.77 (9260) |  |
| **Age** | | |
| 20-39 years | 6.49 (735) | 1.00 |
| 40 to 49 years | 16.92 (1237) | **2.93 (2.6-3.3)***** |
| 50 to 59 years | 33.89 (2089) | **7.39 (6.6-8.3)***** |
| 60 to 69 years | 46.83 (2024) | **12.69 (11.3-14.3)***** |
| 70 to 79 years | 57.57 (1902) | **19.55 (17.2-22.3)***** |
| ≥80 years | 63.73 (1273) | **25.31 (21.7-29.5)***** |
| **Race/Ethnicity** | | |
| White | 28.20 (5923) | 1.00 |
| Black | 24.56 (1927) | **0.83 (0.8-0.9)***** |
| AI/AN | 33.49 (192) | **1.28 (1.0-1.6)*** |
| A/NH/PI | 15.44 (146) | **0.46 (0.4-0.6)***** |
| Hispanic | 14.37 (1072) | **0.43 (0.4-0.5)***** |
| **Education** | | |
| Completed college degree | 19.69 (2500) | 1.00 |
| Completed some college | 22.53 (1701) | **1.19 (1.1-1.3)***** |
| Completed secondary/high school | 30.96 (2931) | **1.83 (1.7-2.0)***** |
| Did not complete secondary/high school | 36.61 (2128) | **2.36 (2.1-2.6)***** |
| **Past Year Household Income US$** | | |
| ≥$70,000 | 17.79 (1,536) | 1.00 |
| $40,000 to $69,000 | 22.77 (1,921) | **1.36 (1.2-1.5)***** |
| $20,000 to $39,000 | 29.85 (2,540) | **1.97 (1.8-2.1)***** |
| ≤$19,999 | 37.81 (3,263) | **2.81 (2.6-3.0)***** |
| **Family History of Dysfunction** | | |
| No | 25.17 (6,616) | 1.00 |
| Yes | 27.29 (2,594) | **1.12 (1.0-1.2)**** |
| **Number of Other Chronic Physical Health Conditions** | | |
| None | 12.60 (2,217) | 1.00 |
| One | 31.16 (2,475) | **3.14 (2.9-3.4)***** |
| Two | 42.31 (1,936) | **5.09 (4.6-5.6)***** |
| ≥Three | 60.75 (2,443) | **10.73 (9.7-11.8)***** |

Boldface indicates statistical significance (**p* *≤*0.05; ***p* ≤0.01; ****p* ≤0.001)

**Abbreviations**: AI/AN = American Indian/Alaska Native; A/NH/PI = Asian/Native Hawaiian/Pacific Islander
